# Supplementary material
Source: HighWire-hosted journal article supplement (https://ard.bmj.com/content/80/12/1604)

## online supplemental figure 6

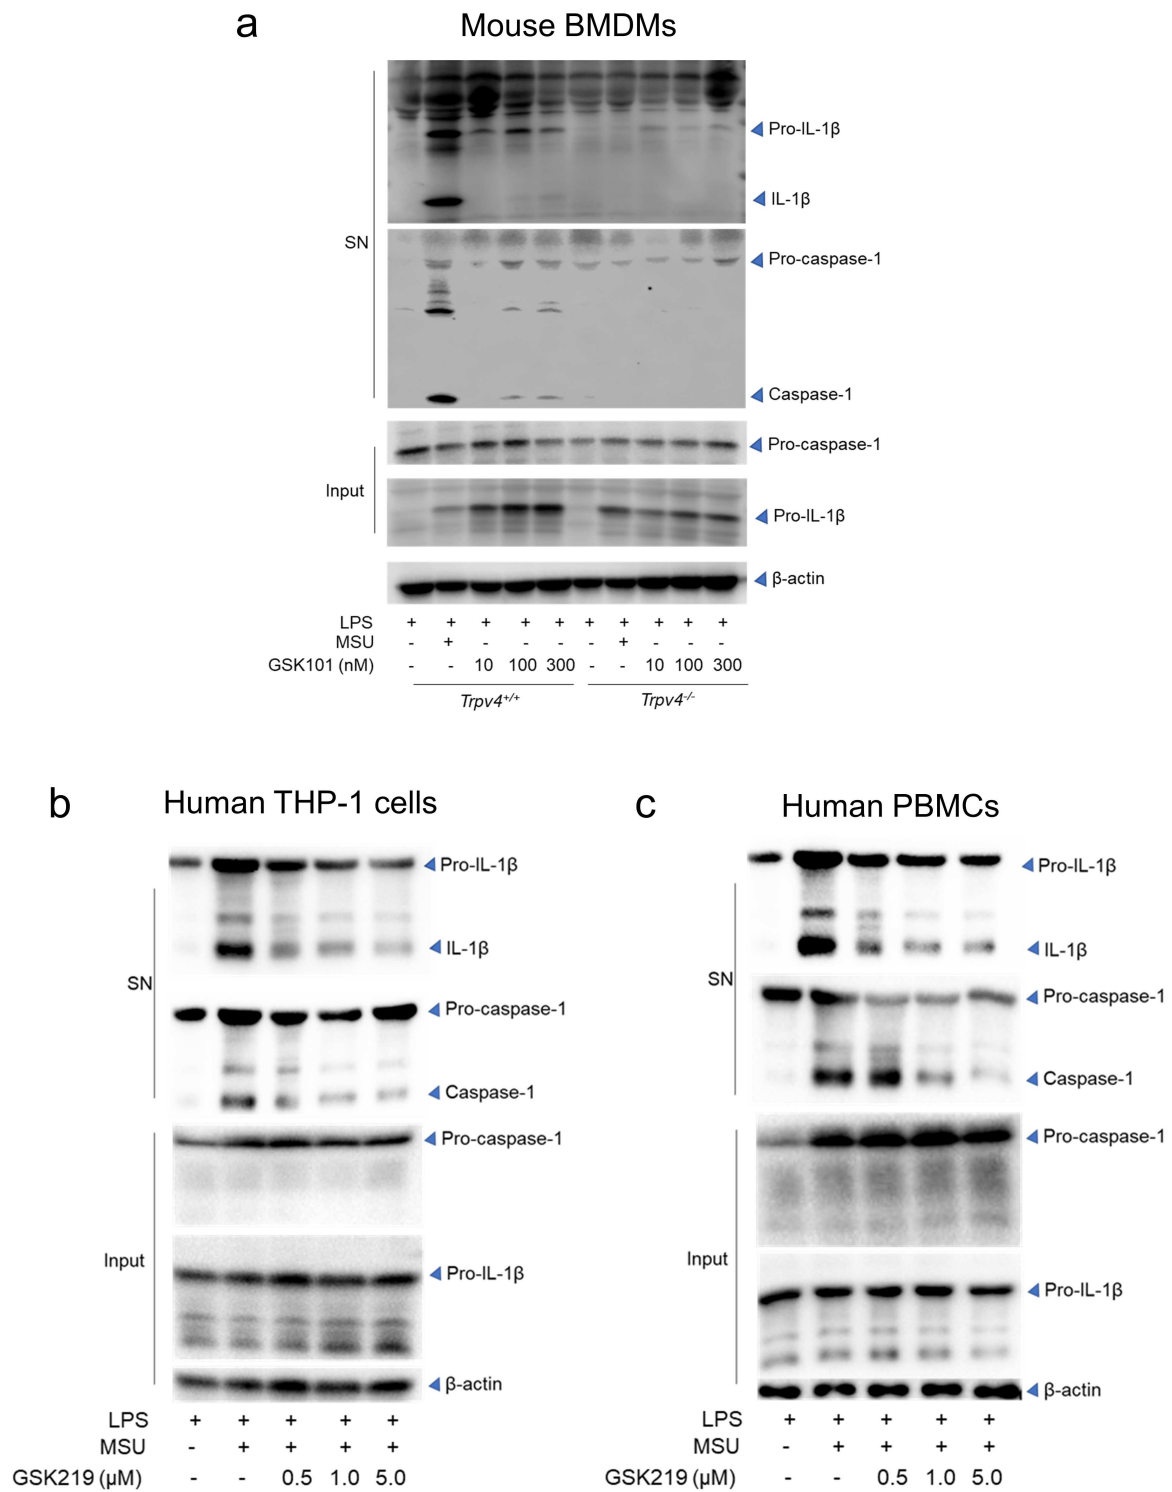

Supplement: inline-supplementary-material-7 [file inline-supplementary-material-7.pdf]
